# Supplementary material for: Women’s satisfaction with midwife-led continuity of care: an observational study in Palestine
Source: PubMed Central journal article supplement — BMJ Open. 2019 Nov 3;9(11):e030324. doi: 10.1136/bmjopen-2019-030324 (PMC6858166; doi:10.1136/bmjopen-2019-030324), 2019-11-03
Supplement: bmjopen-2019-030324supp001.pdf [file bmjopen-2019-030324supp001.pdf]

# Women`s satisfaction of care through the continuum of pregnancy, birth and postnatal period

Side 1

## Consent and general information

- **I read the information sheet about the study, I registered at a Governmental clinic during pregnancy, my last pregnancy was singleton and I wish to participate \***

- Yes
- No

Dette elementet vises dersom et av følgende alternativer er valgt på spørsmål «I read the information sheet about the study, I registered at a Governmental clinic during pregnancy, my last pregnancy was singleton and I wish to participate»: Yes

- **What type of care were you offered at the local Governmental clinic? \***

- Intervention: Continuity of Midwifery Care Model: care from a midwife also employed at the local hospital.
- Control: Regular care from staff employed at the clinic

Dette elementet vises dersom et av følgende alternativer er valgt på spørsmål «I read the information sheet about the study, I registered at a Governmental clinic during pregnancy, my last pregnancy was singleton and I wish to participate»: Yes

- **If you had regular care, who provided care for you?**

- Staff nurse
- Practical nurse
- Health worker
- Male doctor
- Female doctor
- Midwife
- I don`t know
- Other

Dette elementet vises dersom et av følgende alternativer er valgt på spørsmål «I read the information sheet about the study, I registered at a Governmental clinic during pregnancy, my last pregnancy was singleton and I wish to participate»: Yes

- **Where did you receive care during pregnancy from others than governmental facilities? \***

- UNRWA
- Private doctor
- NGO
- Only Governmental
- Other

## Demographic and social information

Dette elementet vises dersom et av følgende alternativer er valgt på spørsmål «I read the information sheet about the study, I registered at a Governmental clinic during pregnancy, my last pregnancy was singleton and I wish to participate»: Yes

- **How old are you? \***

Dette elementet vises dersom et av følgende alternativer er valgt på spørsmål «I read the information sheet about the study, I registered at a Governmental clinic during pregnancy, my last pregnancy was singleton and I wish to participate»: Yes

- **What was your age when you got married? \***

Dette elementet vises dersom et av følgende alternativer er valgt på spørsmål «I read the information sheet about the study, I registered at a Governmental clinic during pregnancy, my last pregnancy was singleton and I wish to participate»: Yes

- **What was your age first time you gave birth? \***

Dette elementet vises dersom et av følgende alternativer er valgt på spørsmål «I read the information sheet about the study, I registered at a Governmental clinic during pregnancy, my last pregnancy was singleton and I wish to participate»: Yes

- **What is the highest level of education you have completed? \***

- Primary school
- High School
- Diploma 2 years after High school
- Bachelor
- Master
- Phd
- Other

- **If other, what kind of education?**

Dette elementet vises dersom et av følgende alternativer er valgt på spørsmål «I read the information sheet about the study, I registered at a Governmental clinic during pregnancy, my last pregnancy was singleton and I wish to participate»: Yes

• **Are you a paid employee? \***

- Yes, full time
- Yes, part time
- No

• **Does your husband have a paid work? \***

- Yes, regularly
- Yes, now and then
- No

• **Does your husband have a job requiring living outside home for longer periods?**

- Yes
- No

• **Where does your parents live? \***

- In the same village/town as me
- In another neighboring village
- In another town in the West Bank
- Outside West Bank

### Reproductive information

• How many pregnancies did you have that went beyond 6 months? \*

• How many live born children do you have? \*

• If you experienced stillbirth, how many times? \*

• How many pregnancies did you have without pregnancy care at all? \*

### Health information about you last pregnancy, birth and postnatal period

• How many weeks is it since your last birth? \*

- At which pregnancy week did you register at the Governmental clinic? \*

- How many pregnancy-visits did you have at the Governmental clinic last pregnancy? \*

- **Do you smoke** \*

- No, never
- Yes, cigarettes now and then
- Yes, cigarettes daily
- Yes, Argile (water-pipe) now and then
- Yes, Argile (Water-pipe) daily

- **Mark if you experience any of the following complications during last pregnancy?** \*

- Anemia Hb 9 or less
- Pre-eclampsia
- Eclampsia
- Placenta Previa
- Vaginal bleeding
- Reduced fetal growth
- Gestational diabetes
- Previous cesarean section
- Pelvic pain
- Violations in the home
- Violations from occupation soldiers/settlers
- Rhesus negative blood type.
- Vomiting causing hospitalization
- Other
- I had had no complications during pregnancy

- If other, describe short what kind of pregnancy complications?

- How often did a doctor do the pregnancy check-ups in the governmental clinic? \*

- How many pregnancy-visits did you have to a private doctor during last pregnancy? \*

- If you used private doctor in addition to Governmental clinic, describe short why you choose to use both:

- **Where you referred to high risk care clinic, hospital or specialist doctor during pregnancy? \***

- Yes, once
- Yes, more than once
- Yes, I was referred but I was not able to go
- No, I was not referred

- **Mark if you experience any of the following complications during last birth? \***

- Birth during transportation
- Instrumental delivery: vacuum
- Instrumental delivery: forceps
- Hemorrhage - severe bleeding
- Elective cesarean section
- Eclampsia
- Acute cesarean section
- Premature birth before 37 weeks` pregnancy
- Premature birth before 34 weeks` pregnancy
- Premature birth before 30 weeks` pregnancy
- other
- I had no medical complications during birth

- If other, describe short what, And/or why cesarean section:

- **Did you experience any of the following complications related to YOURSELF after last birth? \***

- I had anemia, 9 g/dl or less
- I had Infection treated with antibiotics
- Eclampsia
- Perineal tears that caused much pain
- Perineal tears causing infection and fever
- Perineal tears that caused incontinence of faeces
- Problems with breasts causing problems with breastfeeding
- I had painful infection or problems with my breasts
- Feeling so unhappy that I for days cried most of the time
- Feeling so sad that harming myself sometimes occurred to me
- other
- No I had no complications after last birth

- If other explain in few words

- **Mark if your CHILD have any of the following complications after last birth? \***

You can choose more than one alternative:

- My child was transferred to intensive care after birth
  - My child had problems breathing that needed treatment
  - My child had problem sucking the breast
  - My child had jaundice that needed treatment
  - My child got infection treated with antibiotics
  - My child re-hospitalized after going home
  - My child had problems gaining weight
  - Other
  - My child had no complications
- If other, explain in few words:

- **Duration of breastfeeding your last child \***

- I never breastfed my last child
  - I still breastfeed my child, without giving additional food/milk
  - I still breastfeed daily and also give additional food/milk
  - I stopped breastfeeding
- If you stopped breastfeeding, how many weeks did you breastfed your last child without giving additional food.

- **How often did you meet the same healthprovider from the Governmental clinic during the whole period of pregnancy, birth and postnatal period? \***

- Two times
- Three times
- Four times
- Five times
- Six times
- Seven times
- Eight times
- Nine times
- More than nine times

I met different people each time

- **If you met the same Governmental health provider more than once, please explain: \***

- I met the health provider from pregnancy during labour
- I met the health provider from pregnancy in postnatal ward at hospital
- I met the health provider from pregnancy postnatal home visit
- The person I met most times was the nurse
- The person I met most times was the Midwife
- The person I met most times was the doctor
- I don't know the profession of the person I met most times

- **If you used the Governmental service less than four times during pregnancy, why?**

- No female doctor
- No midwife
- No regularity
- No ultrasound
- Bad quality
- Complicated to reach the clinic
- I don't know
- Other

- If other, explain shortly:

### Your satisfaction of care during pregnancy

Describe at what degree you were satisfied with the care you received from the Governmental clinic during pregnancy by choosing between 1 meaning that you totally disagree and 7 totally agree in the following statements:

1 **Totally disagree**    2    3    4    5    6    7 **Totally agree**

At my pregnancy check-ups I was always asked whether I had any questions

|                                                                                                                              | <b>1 Totally<br/>disagree</b> | <b>2</b>              | <b>3</b>              | <b>4</b>              | <b>5</b>              | <b>6</b>              | <b>7<br/>Totally<br/>agree</b> |
|------------------------------------------------------------------------------------------------------------------------------|-------------------------------|-----------------------|-----------------------|-----------------------|-----------------------|-----------------------|--------------------------------|
| The midwives/nurses always kept me informed about what was happening related to my pregnancy                                 | <input type="radio"/>         | <input type="radio"/> | <input type="radio"/> | <input type="radio"/> | <input type="radio"/> | <input type="radio"/> | <input type="radio"/>          |
| The doctor always kept me informed about what was happening related to my pregnancy                                          | <input type="radio"/>         | <input type="radio"/> | <input type="radio"/> | <input type="radio"/> | <input type="radio"/> | <input type="radio"/> | <input type="radio"/>          |
| I was always given an active say in decisions about my care in pregnancy                                                     | <input type="radio"/>         | <input type="radio"/> | <input type="radio"/> | <input type="radio"/> | <input type="radio"/> | <input type="radio"/> | <input type="radio"/>          |
| I always felt my worries, anxieties or concerns about the pregnancy and the baby were taken seriously by the midwives/nurses | <input type="radio"/>         | <input type="radio"/> | <input type="radio"/> | <input type="radio"/> | <input type="radio"/> | <input type="radio"/> | <input type="radio"/>          |
| I always felt my worries, anxieties or concerns about the pregnancy and the baby were taken seriously by the doctors         | <input type="radio"/>         | <input type="radio"/> | <input type="radio"/> | <input type="radio"/> | <input type="radio"/> | <input type="radio"/> | <input type="radio"/>          |
| At my check-ups the midwives/nurses often seemed rushed and busy                                                             | <input type="radio"/>         | <input type="radio"/> | <input type="radio"/> | <input type="radio"/> | <input type="radio"/> | <input type="radio"/> | <input type="radio"/>          |
| At my check-ups the doctors often seemed rushed and busy                                                                     | <input type="radio"/>         | <input type="radio"/> | <input type="radio"/> | <input type="radio"/> | <input type="radio"/> | <input type="radio"/> | <input type="radio"/>          |
| Care in pregnancy was provided in a competent way                                                                            | <input type="radio"/>         | <input type="radio"/> | <input type="radio"/> | <input type="radio"/> | <input type="radio"/> | <input type="radio"/> | <input type="radio"/>          |
| I was happy with the emotional support I received in in                                                                      | <input type="radio"/>         | <input type="radio"/> | <input type="radio"/> | <input type="radio"/> | <input type="radio"/> | <input type="radio"/> | <input type="radio"/>          |

|                                                                                                                                          | 1                     | 2                     | 3                     | 4                     | 5                     | 6                     | 7                     |
|------------------------------------------------------------------------------------------------------------------------------------------|-----------------------|-----------------------|-----------------------|-----------------------|-----------------------|-----------------------|-----------------------|
|                                                                                                                                          | Totally disagree      |                       |                       |                       |                       |                       | Totally agree         |
| pregnancy from midwives/nurses                                                                                                           |                       |                       |                       |                       |                       |                       |                       |
|                                                                                                                                          | 1                     | 2                     | 3                     | 4                     | 5                     | 6                     | 7                     |
|                                                                                                                                          | Totally disagree      |                       |                       |                       |                       |                       | Totally agree         |
| I was happy with the emotional support I received in pregnancy from doctors                                                              | <input type="radio"/> |
| I was happy with the physical care I received in pregnancy from midwives/nurses                                                          | <input type="radio"/> |
| I was happy with the physical care I received in pregnancy from doctors                                                                  | <input type="radio"/> |
| My privacy was very well respected and taken care of from midwives/nurses                                                                | <input type="radio"/> |
| I was afraid that I would have problems to reach pregnancy care because of occupation soldiers or settlers                               | <input type="radio"/> |
| Describe your overall satisfaction with the care you received during last pregnancy at the MOH clinic (1 is very bad and 7 in very good) | <input type="radio"/> |

### Your satisfaction of care during birth

- **Where did you give birth? \***

- Governmental hospital

- Private hospital
- UNRWA hospital
- PRCS hospital
- Israeli hospital
- Under transportation (car)
- Ambulance
- Other
- If other, where?

**Describe at what degree you were satisfied with the care you received at hospital during labour and birth by choosing between 1 meaning that you totally disagree and 7 totally agree in the following statements:**

|                                                                                     | 1 I totally disagree  | 2                     | 3                     | 4                     | 5                     | 6                     | 7 I totally agree     |
|-------------------------------------------------------------------------------------|-----------------------|-----------------------|-----------------------|-----------------------|-----------------------|-----------------------|-----------------------|
| The midwives always kept me informed about what was happening during birth          | <input type="radio"/> |
| The doctors always kept me informed about what was happening during birth           | <input type="radio"/> |
| I was always given an active say in decisions about my care during labour and birth | <input type="radio"/> |
| The midwives were encouraging                                                       | <input type="radio"/> |
| The doctors were encouraging                                                        | <input type="radio"/> |
| The midwives provided reassurance if I needed it                                    | <input type="radio"/> |
| The doctors provided reassurance if I needed it                                     | <input type="radio"/> |

|                                                                                                                                          | <b>1 I totally disagree</b> | <b>2</b>              | <b>3</b>              | <b>4</b>              | <b>5</b>              | <b>6</b>              | <b>7 I totally agree</b> |
|------------------------------------------------------------------------------------------------------------------------------------------|-----------------------------|-----------------------|-----------------------|-----------------------|-----------------------|-----------------------|--------------------------|
| I felt nobody really cared for me during labour and birth                                                                                | <input type="radio"/>       | <input type="radio"/> | <input type="radio"/> | <input type="radio"/> | <input type="radio"/> | <input type="radio"/> | <input type="radio"/>    |
| I was happy with the emotional support I received from the midwives                                                                      | <input type="radio"/>       | <input type="radio"/> | <input type="radio"/> | <input type="radio"/> | <input type="radio"/> | <input type="radio"/> | <input type="radio"/>    |
| I was happy with the emotional support I received from the doctors                                                                       | <input type="radio"/>       | <input type="radio"/> | <input type="radio"/> | <input type="radio"/> | <input type="radio"/> | <input type="radio"/> | <input type="radio"/>    |
|                                                                                                                                          | <b>1 I totally disagree</b> | <b>2</b>              | <b>3</b>              | <b>4</b>              | <b>5</b>              | <b>6</b>              | <b>7 I totally agree</b> |
| Care during labour and birth was provided in a professional way                                                                          | <input type="radio"/>       | <input type="radio"/> | <input type="radio"/> | <input type="radio"/> | <input type="radio"/> | <input type="radio"/> | <input type="radio"/>    |
| I wish someone from my family could accompany me during labour and birth                                                                 | <input type="radio"/>       | <input type="radio"/> | <input type="radio"/> | <input type="radio"/> | <input type="radio"/> | <input type="radio"/> | <input type="radio"/>    |
| My privacy was well respected during labour and birth                                                                                    | <input type="radio"/>       | <input type="radio"/> | <input type="radio"/> | <input type="radio"/> | <input type="radio"/> | <input type="radio"/> | <input type="radio"/>    |
| I felt badly treated by the midwives during labour and birth                                                                             | <input type="radio"/>       | <input type="radio"/> | <input type="radio"/> | <input type="radio"/> | <input type="radio"/> | <input type="radio"/> | <input type="radio"/>    |
| I felt badly treated by the doctors during labour and birth                                                                              | <input type="radio"/>       | <input type="radio"/> | <input type="radio"/> | <input type="radio"/> | <input type="radio"/> | <input type="radio"/> | <input type="radio"/>    |
| When labour started I was afraid that I would not reach hospital because of the military checkpoints and occupation soldiers or settlers | <input type="radio"/>       | <input type="radio"/> | <input type="radio"/> | <input type="radio"/> | <input type="radio"/> | <input type="radio"/> | <input type="radio"/>    |

1 | totally disagree    2    3    4    5    6    7 | totally agree

Overall, how would you describe the care you received in labour and birth (1 very poor, 7 very good)

                      

### Your satisfaction with the care you received after birth

- How many hours did you spend in hospital after your last birth? \*

- What was the birth-weight of your last child? \*

**Describe at what degree you were satisfied with the care you received after birth in the hospital choosing between 1 meaning you totally disagree and 7 totally agree in the following statements:**

1 | Totally disagree    2    3    4    5    6    7 | Totally agree

I was given the advice I needed with breastfeeding at hospital

                      

I was given the advice I needed about how to handle, settle or look after my baby in the hospital

                      

I was given the advice I needed about any problems with the baby's health and progress in the hospital

                      

I was given the advice I needed in hospital about my

|                                                                                                                   | 1   Totally disagree  | 2                     | 3                     | 4                     | 5                     | 6                     | 7   Totally agree     |
|-------------------------------------------------------------------------------------------------------------------|-----------------------|-----------------------|-----------------------|-----------------------|-----------------------|-----------------------|-----------------------|
| own health and recovery in after birth                                                                            |                       |                       |                       |                       |                       |                       |                       |
| Care after birth in hospital was provided in a competent way                                                      | <input type="radio"/> |
| Midwives in hospital were supportive after birth                                                                  | <input type="radio"/> |
| Doctors in hospital were supportive after birth                                                                   | <input type="radio"/> |
| I was happy by the emotional support from midwives after birth in hospital                                        | <input type="radio"/> |
| My privacy was taken good care of at the hospital after birth                                                     | <input type="radio"/> |
| Overall, how would you describe the care you received in hospital after birth (1 is very poor and 7 is very good) | <input type="radio"/> |

• **From where did you receive care for yourself and your baby after leaving hospital? \***

You can choose more than one alternative:

- Governmental clinic
- Governmental home-visit
- UNRWA clinic
- Private doctor
- NGO clinic
- Only family cared for me, the baby got vaccination
- No one cared for me, they only cared for the baby
- Home-visit from UNRWA/NGO

Other

- If other, from whom did you receive care?

- **Who did the home-visit after birth? \***

- My midwife from pregnancy care
- The nurse from the clinic
- The doctor
- My midwife from pregnancy and the nurse from the clinic
- Other
- I had no home visit

- If other, who did the home visit?

- How many home visits did you receive?

- How many days after birth did you receive home visit?

If you received home visit after birth:

**Describe at what degree you were satisfied with the care you received after birth in your home choose between 1 meaning you totally disagree and 7 totally agree in the following statements:**

Dette elementet vises dersom et av følgende alternativer er valgt på spørsmål «From where did you receive care for yourself and your baby after leaving hospital?»: Governmental homevisit

**1 Totally disagree      2      3      4      5      6      7 Totally agree**

During the home visit the midwife/nurse gave me the advice I needed with breastfeeding

      

During home visit I was given the advice I needed to handle and look after my baby

|                                                                                                                           | 1 <b>Totally disagree</b> | 2                     | 3                     | 4                     | 5                     | 6                     | 7 <b>Totally agree</b> |
|---------------------------------------------------------------------------------------------------------------------------|---------------------------|-----------------------|-----------------------|-----------------------|-----------------------|-----------------------|------------------------|
| During the home visit I was given the advice I needed to look after my own health and recovery after birth                | <input type="radio"/>     | <input type="radio"/> | <input type="radio"/> | <input type="radio"/> | <input type="radio"/> | <input type="radio"/> | <input type="radio"/>  |
| I got enough time to ask all the questions I had during home visit                                                        | <input type="radio"/>     | <input type="radio"/> | <input type="radio"/> | <input type="radio"/> | <input type="radio"/> | <input type="radio"/> | <input type="radio"/>  |
| I receive helpful information about family planning during the home visit                                                 | <input type="radio"/>     | <input type="radio"/> | <input type="radio"/> | <input type="radio"/> | <input type="radio"/> | <input type="radio"/> | <input type="radio"/>  |
| I was happy for the emotional support I received from the midwife/nurse during home visit                                 | <input type="radio"/>     | <input type="radio"/> | <input type="radio"/> | <input type="radio"/> | <input type="radio"/> | <input type="radio"/> | <input type="radio"/>  |
| Overall, how would you describe the care you received for yourself at home visit (1 means very bad and 7 means very good) | <input type="radio"/>     | <input type="radio"/> | <input type="radio"/> | <input type="radio"/> | <input type="radio"/> | <input type="radio"/> | <input type="radio"/>  |
| Overall, how would you describe the care your baby received at home visit (1 means very bad and 7 means very good)        | <input type="radio"/>     | <input type="radio"/> | <input type="radio"/> | <input type="radio"/> | <input type="radio"/> | <input type="radio"/> | <input type="radio"/>  |
|                                                                                                                           |                           |                       |                       |                       | <b>yes</b>            | <b>no</b>             | <b>I don't know</b>    |
| If you did not receive home visit after birth, would you like to have had the possibility                                 |                           |                       |                       |                       | <input type="radio"/> | <input type="radio"/> | <input type="radio"/>  |

**Describe at what degree you were satisfied with the care you received after birth in the Governmental clinic, choose between 1 meaning you totally disagree and 7 totally agree in the following statements:**

|                                                                                                      | 1 Totally disagree    | 2                     | 3                     | 4                     | 5                     | 6                     | 7 Totally agree       |
|------------------------------------------------------------------------------------------------------|-----------------------|-----------------------|-----------------------|-----------------------|-----------------------|-----------------------|-----------------------|
| I was given the advice I needed at the clinic about how to handle, settle or look after my baby      | <input type="radio"/> |
| At the clinic I was given the advice I needed about any problems with the baby`s health and progress | <input type="radio"/> |
| At the clinic I was given the advice I needed about my own health and recovery after the birth       | <input type="radio"/> |
| At the clinic, the nurse only had time to vaccinate the baby, no time for individual information     | <input type="radio"/> |
| My privacy was taken good care of at the clinic                                                      | <input type="radio"/> |
| I was happy for emotional support I received at the clinic after birth                               | <input type="radio"/> |
| I received good advice regarding family planning and contraceptives at the clinic                    | <input type="radio"/> |
| Overall, how would you describe the care your baby received at the clinic after birth                | <input type="radio"/> |

1 **Totally disagree**    2    3    4    5    6    7 **Totally agree**

(1 is very bad and 7 is very good)

Overall, how would you describe the care you received for yourself at the clinic after birth (1 is very bad and 7 is very good)

                      

1 **Very bad**    2    3    4    5    6    7 **Very good**

Overall how satisfied were you with all care after birth that you received from Government services on a scale from 1 (Very bad) to 7 (very good)?

                      

1 **Very bad**    2    3    4    5    6    7 **Very good**

Overall how satisfied were you with the total Governmental services on a scale from 1 (very bad) to 7 (very good)

                      

- Do you have any recommendations to improve the Governmental service?

Thank you very much for your participation, your answers will guide us to develop the future services.

Nettskjema v81.1
