# Supplementary material for: Women’s satisfaction with midwife-led continuity of care: an observational study in Palestine
Source: PubMed Central journal article supplement — BMJ Open. 2019 Nov 3;9(11):e030324. doi: 10.1136/bmjopen-2019-030324 (PMC6858166; doi:10.1136/bmjopen-2019-030324), 2019-11-03
Supplement: bmjopen-2019-030324supp002.pdf [file bmjopen-2019-030324supp002.pdf]

**Supplementary file 2 Original Likert scales**  
**Satisfaction with care**

| <b>Satisfaction with care during pregnancy</b>                                                                               | Midwife-led care | Regular care | Adj. Mean difference | 95%CI          | adj.p value |
|------------------------------------------------------------------------------------------------------------------------------|------------------|--------------|----------------------|----------------|-------------|
| At my pregnancy check-ups I was always asked whether I had any questions                                                     | 5.61(1.54)       | 4.55(2.19)   | 1.06                 | 0.54 to 1.59   | <0.001      |
| The midwives/nurses always kept me informed about what was happening related to my pregnancy                                 | 6.10(1.24)       | 5.53(1.77)   | 0.54                 | 0.12 to 0.95   | 0.014       |
| The doctor always kept me informed about what was happening related to my pregnancy                                          | 5.13(1.67)       | 5.06(1.90)   | -0.004               | -0.52 to 0.48  | 0.982       |
| I was always given an active say in decisions about my care in pregnancy                                                     | 4.40(1.84)       | 4.31(2.06)   | 0.08                 | -0.45 to 0.65  | 0.768       |
| I always felt my worries, anxieties or concerns about the pregnancy and the baby were taken seriously by the midwives/nurses | 5.90(1.44)       | 5.57(1.59)   | 0.34                 | -0.10 to 0.76  | 0.123       |
| I always felt my worries, anxieties or concerns about the pregnancy and the baby were taken seriously by the doctors         | 5.36(1.69)       | 5.15(1.87)   | 0.20                 | -0.34 to 0.69  | 0.461       |
| At my check-ups the midwives/nurses often seemed rushed and busy                                                             | 1.30(1.02)       | 2.18(1.89)   | -0.88                | -1.32 to -0.47 | <0.001      |
| At my check-ups the doctors often seemed rushed and busy                                                                     | 2.03(1.90)       | 2.38(2.10)   | -0.33                | -0.90 to 0.25  | 0.246       |
| Care in pregnancy was provided in a competent way                                                                            | 5.24(1.33)       | 5.42(1.49)   | -0.19                | -0.58 to 0.21  | 0.336       |
| I was happy with the emotional support I received in in pregnancy from midwives/nurses                                       | 6.11(1.20)       | 5.19(1.84)   | 0.92                 | 0.46 to 1.33   | <0.001      |
| I was happy with the emotional support I received in in pregnancy from doctors                                               | 5.22(1.64)       | 4.76(2.1)    | 0.40                 | -0.17 to 0.93  | 0.154       |
| I was happy with the physical care I received in pregnancy from midwives/nurses                                              | 5.98(1.30)       | 5.72(1.77)   | 0.26                 | -0.17 to 0.67  | 0.234       |
| I was happy with the physical care I received in pregnancy from doctors                                                      | 5.45(1.74)       | 5.36(2.01)   | 0.03                 | -0.56 to 0.53  | 0.906       |

|                                                                                                            |            |            |       |               |       |
|------------------------------------------------------------------------------------------------------------|------------|------------|-------|---------------|-------|
| My privacy was very well respected and taken care of from midwives/nurses                                  | 6,58(0.89) | 6.43(1.01) | 0.26  | -0.17 to 0.67 | 0.234 |
| I was afraid that I would have problems to reach pregnancy care because of occupation soldiers or settlers | 1.03(0,30) | 1.14(0,87) | -0.10 | -0.31 to 0.06 | 0.275 |
| Describe your overall satisfaction with the care you received during last pregnancy at the MOH clinic      | 5.57       | 5.38       | 0.16  | -0.18 to 0.46 | 0.335 |
| <b>Satisfaction with care during labour and birth</b>                                                      |            |            |       |               |       |
| The midwives always kept me informed about what was happening during labour and birth                      | 5.29(1.89) | 4.84(2.04) | 0.62  | 0.06 to 1.18  | 0.030 |
| The doctors always kept me informed about what was happening during labour and birth                       | 4.60(1.93) | 4.29(1.89) | 0.52  | -0.09 to 1.10 | 0.099 |
| I was always given an active say in decisions about my care during labour and birth                        | 3.91(2.05) | 3.8(2.24)  | 0.49  | -0.11 to 1.07 | 0.103 |
| The midwives were encouraging                                                                              | 5.27(1.99) | 4.94(1.14) | 0.56  | -0.05 to 1.15 | 0.067 |
| The doctors were encouraging                                                                               | 4.70(2.02) | 4.44(2.35) | 0.46  | -0.18 to 1.12 | 0.166 |
| The midwives provided reassurance if I needed it                                                           | 5.41(2.13) | 4.85(2.12) | 0.79  | 0.19 to 1.39  | 0.010 |
| The doctors provided reassurance if I needed it                                                            | 4.79(2.18) | 4.32(2.36) | 0.73  | 0.10 to 1.37  | 0.027 |
| I felt nobody really cared for me during labour and birth                                                  | 2.51(2.24) | 2.54(2.22) | -0.29 | -0.93 to 0.33 | 0.363 |
| I was happy with the emotional support I received from the midwives                                        | 5.19(2.14) | 4.67(2.22) | 0.79  | 0.18 to 1.39  | 0.013 |
| I was happy with the emotional support I received from the doctors                                         | 4.52(2.08) | 4.32(2.36) | 0.47  | -0.17 to 1.11 | 0.158 |
| Care during labour and birth was provided in a professional way                                            | 4.72(1.85) | 4.83(1.94) | 0.10  | -0.43 to 0.64 | 0.704 |
| I wish someone from my family could accompany me during labour and birth                                   | 6.05(1.82) | 5.99(2.19) | 0.03  | -0.56 to 0.64 | 0.914 |

|                                                                                                                                          |            |            |       |                |        |
|------------------------------------------------------------------------------------------------------------------------------------------|------------|------------|-------|----------------|--------|
| My privacy was well respected during labour and birth                                                                                    | 6.00(1.49) | 5.23(1.96) | 1.00  | 0.52 to 1.50   | <0.001 |
| I felt abused from the midwives during labour and birth                                                                                  | 1.55(1.55) | 1.91(1.89) | -0.56 | -1.08 to -0.07 | 0.031  |
| I felt abused from the doctors during labour and birth                                                                                   | 1.51(1.47) | 1.68(1.72) | -0.33 | -0.85 to 0.13  | 0.168  |
| When labour started I was afraid that I would not reach hospital because of the military checkpoints and occupation soldiers or settlers | 1.36(1.36) | 2.24(2.15) | -0.79 | -1.34 to -0.24 | 0.008  |
| Overall, how would you describe the care you received in labour and birth (1 very poor, 7 very good)                                     | 5.14(1.53) | 4.88(1.75) | 0.51  | 0.06 to 0.98   | 0.028  |
| <b>Satisfaction during postnatal hospital stay</b>                                                                                       |            |            |       |                |        |
| I was given the advice I needed with breast feeding at hospital                                                                          | 4.48(2.24) | 3.19(2.30) | 1.35  | 0.69 to 2.19   | <0.001 |
| I was given the advice I needed about how to handle, settle or look after my baby in the hospital                                        | 4.28(2.19) | 2.68(2.27) | 1.68  | 1.03 to 2.43   | <0.001 |
| I was given the advice I needed about any problems with the baby's health and progress in the hospital                                   | 4.45(2.24) | 2.83(2.29) | 1.72  | 1.02 to 2.53   | <0.001 |
| I was given the advice I needed in hospital about my own health and recovery in after birth                                              | 4.37(2.33) | 3.03(2.20) | 1.42  | 0.78 to 2.11   | <0.001 |
| Care after birth in hospital was provided in a competent way                                                                             | 4.81(1.87) | 3.69(1.99) | 1.20  | 0.61 to 1.88   | <0.001 |
| Midwives in hospital were supportive after birth                                                                                         | 5.48(1.85) | 4.05(2.12) | 1.52  | 0.92 to 2.17   | <0.001 |
| Doctors in hospital were supportive after birth                                                                                          | 4.70(1.87) | 3.25(2.30) | 1.53  | 0.90 to 2.26   | <0.001 |
| I was happy by the emotional support from midwives after birth in hospital                                                               | 5.42(1.95) | 3.68(2.16) | 1.81  | 1.19 to 2.47   | <0.001 |
| My privacy was taken good care of at the hospital after birth                                                                            | 6.21(1.16) | 4.89(2.03) | 1.38  | 0.89 to 1.99   | <0.001 |

|                                                                                                                                 |            |            |       |                |        |
|---------------------------------------------------------------------------------------------------------------------------------|------------|------------|-------|----------------|--------|
| Overall, how would you describe the care you received in hospital after birth (1 is very poor and 7 is very good)               | 5.01(1.52) | 4.1(1.85)  | 0.98  | 0.49 to 1.57   | <0.001 |
| <b>Satisfaction with care received from Governmental clinic after birth</b>                                                     |            |            |       |                |        |
| I was given the advice I needed at the clinic about how to handle, settle or look after my baby                                 | 4.83(1.84) | 4.37(2.21) | 0.49  | -0.10 to 1.04  | 0.097  |
| At the clinic I was given the advice I needed about any problems with the baby's health and progress                            | 5.06(1.58) | 4.61(2.04) | 0.49  | -0.03 to 1.05  | 0.060  |
| At the clinic I was given the advice I needed about my own health and recovery after the birth                                  | 4.38(2.00) | 4.03(2.27) | 0.35  | -0.25 to 0.94  | 0.244  |
| At the clinic the nurse only had time to vaccinate the baby, no time for individual information                                 | 2.54(2.07) | 2.10(1.93) | 0.83  | -0.18 to 0.90  | 0.185  |
| My privacy was taken good care of at the clinic                                                                                 | 5.98(1.12) | 6.03(1.14) | -0.04 | -0.38 to 0.32  | 0.803  |
| I was happy for emotional support I received at the clinic after birth                                                          | 4.95(1.83) | 5.09(1.72) | -0.12 | -0.63 to 0.37  | 0.641  |
| I received good advice regarding family planning and contraceptives at the clinic                                               | 4.51(2.05) | 3.74(2.21) | 0.76  | 0.18 to 1.32   | 0.012  |
| Overall, how would you describe the care your baby received at the clinic after birth (1 is very bad and 7 is very good)        | 5.43(1.2)  | 5.80(1.01) | -0.34 | -0.67 to -0.02 | 0.032  |
| Overall, how would you describe the care you received for yourself at the clinic after birth (1 is very bad and 7 is very good) | 4.61(1.44) | 4.79(1.15) | -0.17 | -0.60 to 0.24  | 0.447  |
| Overall how satisfied were you with all care after birth that you received from Government services                             | 4.79(1.15) | 4.93(1.14) | -0.12 | -0.46 to 0.19  | 0.460  |
| Overall how satisfied were you with the total Governmental services on a scale from 1 (very bad) to 7 (very good)               | 5.04(1.35) | 4.88(1.15) | 0.16  | -0.19 to 0.51  | 0.366  |
| <b>Satisfaction during postnatal home visit</b>                                                                                 |            |            |       |                |        |
| During the home visit the midwife/nurse gave me the advice I needed with breastfeeding                                          | 5.91(1.42) |            |       |                |        |
| During home visit I was given the advice I needed to handle and look after my baby                                              | 5.63(1.57) |            |       |                |        |
| During the home visit I was given the advice I needed to look after my own health and recovery after birth                      | 6.01(1.54) |            |       |                |        |

---

|                                                                                                                           |            |
|---------------------------------------------------------------------------------------------------------------------------|------------|
| I got enough time to ask all the questions I had during home visit                                                        | 5.51(1.37) |
| I receive helpful information about family planning during the home visit                                                 | 5.26(2.04) |
| I was happy for the emotional support I received from the midwife/nurse during home visit                                 | 6.50(0.87) |
| Overall, how would you describe the care you received for yourself at home visit (1 means very bad and 7 means very good) | 6.05(0.98) |
| Overall, how would you describe the care your baby received at home visit (1 means very bad and 7 means very good)        | 5.83(1.18) |

---
